# CAM emerges in a leaf metabolic model under water-saving constraints in different environments

Nadine Töpfer<sup>1,2</sup>, Thomas Braam<sup>2,3</sup>, Sanu Shameer<sup>2</sup>, R. George Ratcliffe<sup>2</sup> and Lee J. Sweetlove<sup>2</sup>

1 Leibniz Institute of Plant Genetics and Crop Plant Research, Gatersleben, Germany, [toepfer@ipk-gatersleben.de](mailto:toepfer@ipk-gatersleben.de)

2 Department of Plant Sciences, University of Oxford, South Parks Road, Oxford, OX1 3RB, UK

3 Innova Solutions, 6F.-6, No. 288, Sec. 6, Civic Boulevard., Xinyi District, Taipei City 11087, Taiwan

## Abstract

Crassulacean Acid Metabolism (CAM) evolved in arid environments as a water-saving alternative to C<sub>3</sub> photosynthesis. There is great interest in engineering more drought-resistant crop species by introducing CAM into C<sub>3</sub> plants. However, one of the open questions is whether full CAM or alternative water-saving flux modes would be more productive in the environments typically experienced by C<sub>3</sub> crops. To study the effect of temperature and relative humidity on plant metabolism we coupled a time-resolved diel model of leaf metabolism to an environment-dependent gas-exchange model. This model allowed us to study the emergence of CAM or CAM-like behaviour as a result of a trade-off between leaf productivity and water-saving. We show that vacuolar storage capacity in the leaf is a major determinant of the extent of CAM and shapes the occurrence of phase II and IV of the CAM cycle. Moreover, the model allows us to study alternative flux routes and we identify mitochondrial isocitrate dehydrogenase (ICDH) and an isocitrate-citrate-proline-2OG cycle as a potential contributor to initial carbon fixation at night. Simulations across a wide range of environmental parameters show that the water-saving potential of CAM strongly depends on the environment and that the additional water-saving effect of carbon fixation by ICDH can reach up to 4% for the conditions tested.

## Introduction

Increasing aridity threatens agricultural productivity not only in hot and dry climates but also in temperate regions where extreme weather conditions are becoming more frequent<sup>1</sup>. Thus, the development of water-use efficient crop varieties is of utmost importance to maintain food security<sup>2</sup>. Several plant lineages living in arid environments have evolved CAM photosynthesis, a water-saving mode of C-fixation in which CO<sub>2</sub> uptake into the mesophyll cell and fixation by RuBisCO are temporally separated<sup>3</sup>. In CAM photosynthesis the stomata open at night and CO<sub>2</sub> is fixed and stored in the vacuole in the form of a carboxylic acid such as malate or (iso-)citrate<sup>4-7</sup>. During the day the stored CO<sub>2</sub> is remobilized for fixation by RuBisCO in the chloroplast, accompanied by the accumulation of storage carbohydrates. This cycle is considered to be an energetically expensive, but water-use-efficient, alternative to direct daytime CO<sub>2</sub>-fixation by RuBisCO (C<sub>3</sub> photosynthesis)<sup>8,9</sup>.

The implementation of CAM photosynthesis into a C<sub>3</sub> crop plant is a promising engineering target for two reasons: first, all enzymes required for the CAM cycle are already present in C<sub>3</sub> plants (although specific isoforms with different regulatory properties are required<sup>10</sup>); and second, some facultative CAM species, such as ice plant (*Mesembryanthemum crystallinum*), can be induced to switch from C<sub>3</sub> to CAM photosynthesis by a number of environmental factors such as drought or high-salinity<sup>8,11</sup> suggesting that it should be possible

47 to engineer CAM into a C<sub>3</sub> leaf. However, CAM photosynthesis is usually considered to be  
48 advantageous in hot and arid climates where water-use efficiency (WUE) is a strong  
49 determinant for plant growth and where the suppression of photorespiration through carbon  
50 concentration behind closed stomata becomes a considerable factor that balances the  
51 additional cost of running the expensive CAM cycle<sup>12</sup>. To test this hypothesis, in a previous  
52 study, we investigated the energetics and productivity of CAM and found that despite 3-fold  
53 higher energy consumption at night, the additional cost of running a CAM cycle can be  
54 balanced by the carbon-concentrating effect of carboxylic acid decarboxylation behind closed  
55 stomata during the day<sup>13</sup>.

56 Here we addressed a different question: what are the metabolic and morphological  
57 limitations to implementing a water-saving CAM or CAM-like mechanism in a C<sub>3</sub> leaf and what  
58 is the extent of the water-saving effect in different environments? To address this question,  
59 we constructed a time-resolved, large-scale metabolic leaf model and coupled it to a gas-  
60 exchange model that includes the two main determinants of water-loss through the stomata  
61 — the temperature (T) and the relative humidity (RH). This environment-coupled model was  
62 used to investigate emergent flux modes when water-saving constraints are applied in addition  
63 to high productivity.

## 64 **Results**

### 65 **Model construction**

66 Light availability and gas exchange (CO<sub>2</sub>, water vapour) are major determinants of the  
67 metabolic behaviour of a plant leaf. To model the interplay between leaf productivity and water-  
68 loss through transpiration we extended a previous diel flux-balance modelling framework<sup>13</sup> in  
69 two ways. First, we increased the temporal resolution from a binary day-night scenario to  
70 modelling a 24 time-step diel cycle, where each interval represents one hour of the day. The  
71 time-resolution in the models was achieved by coupling 24 copies of the model in way that a  
72 range of metabolites (starch, sugars, amino acids, carboxylic acids, and nitrate) were allowed  
73 to accumulate and subsequently be degraded in the plastid and vacuole, respectively. For  
74 each of these metabolites we introduced *linker fluxes* which transfer the accumulated  
75 metabolite from one time interval to the next. Upper bounds were placed on the quantity of  
76 carboxylic acids and other compounds that were allowed to accumulate in the vacuole based  
77 on vacuole size and leaf anatomy (leaf thickness and porosity) for average C<sub>3</sub> and CAM  
78 leaves. Secondly, we coupled the metabolic model to a simplified gas-diffusion model which  
79 allows us to compute water-loss through the stomata according to the CO<sub>2</sub> demand of the  
80 metabolic system and the environmental conditions (T and RH). A detailed description of the  
81 model construction and the exchange constraints is given in the Materials and Methods  
82 section. The resulting time-resolved, environment-coupled model enabled us to simulate the  
83 effect of the diel light curve, T and RH on leaf metabolism and was used to study the trade-  
84 offs between leaf productivity and water-use efficiency (Figure 1).

85 In this study we considered the metabolism of a mature leaf and started the analysis  
86 by using the maximization of phloem output over the course of the day as the primary  
87 objective. This optimality criterion led the metabolic system to synthesize storage compounds  
88 in the light which were then used to sustain night-time metabolic processes such as phloem  
89 output, maintenance, and nitrogen assimilation in an overall optimal manner. In accordance  
90 with the metabolic mode of the system, the model predicted changing CO<sub>2</sub>-demand and —  
91 depending on T and RH — water-loss by transpiration over the course of the day. Conversely,  
92 we could fix phloem output to a given value (equal to or less than the maximum value) and  
93

94 used minimization of water-loss as a driving force to act on the metabolic system. These  
95 constraints led to the prediction of water-saving flux modes while maintaining high productivity.

96

## 97 **Model Analysis & Biological Implications**

### 98 *A time-resolved diel model simulates dynamics of C<sub>3</sub> metabolism*

99 To establish a reference model for a mature leaf operating under optimal conditions we began  
100 our analysis by simulating an energy-limited scenario (due to the maximisation of phloem  
101 output for a fixed light input) without water-saving constraints. We simulated a typical summer  
102 day in a temperate climate with a maximum T of 26°C and a maximum RH of 0.8 (Figure 2A).  
103 We used a light curve that peaks at a moderate intensity of 250  $\mu\text{mol m}^{-2} \text{s}^{-1}$  and follows a  
104 normal distribution with a day length of 12 hours. As a second optimization criterion we  
105 minimized the metabolic flux sum<sup>14</sup>. This objective was used as a proxy for the cost of  
106 providing the enzymes for the active reactions. Applying it as a second optimality criterion left  
107 the objective value, here the phloem output, unaltered, but chose the flux distribution with the  
108 least enzymatic cost from a set of alternatives.

109 Using this setup, the model predicted a total phloem output of 41.3  $\text{mmol m}^{-2} \text{leaf d}^{-1}$ .  
110 Daily total water loss was predicted to be 116.4  $\text{mol m}^{-2} \text{leaf}$  which is 2.1  $\text{L m}^{-2} \text{leaf}$  and  $\text{CO}_2$   
111 uptake was 446.4  $\text{mmol m}^{-2} \text{leaf}$ . This resulted in 260.7  $\text{mol H}_2\text{O}$  lost per  $\text{CO}_2$  fixed. For extreme  
112 conditions with a maximum T of 40°C and a maximum RH of 0.4 this value increases to 955.3  
113  $\text{mol H}_2\text{O}$  lost per  $\text{CO}_2$  fixed. Comparing this value to the rule of thumb for C<sub>3</sub> plants “900-1200  
114 moles  $\text{H}_2\text{O}$  per mol  $\text{CO}_2$  fixed”<sup>15</sup> we found that our model is in broad agreement with  
115 experimental observations. This was reassuring, given the simple nature of the gas-exchange  
116 model and the fact that the water-loss was predicted from the model’s demand for  $\text{CO}_2$  to  
117 maximize phloem output — thereby approving the choice of the objective function.

118 To get a better overview of the metabolic behaviour over the course of the diel cycle  
119 we examined the  $\text{CO}_2$  uptake, RuBisCO activity and the linker fluxes for starch and carboxylic  
120 acids, respectively as shown in Figure 2B. The magnitude of a linker flux corresponds to the  
121 amount of the stored metabolite, i.e. a flux of 1  $\mu\text{mol m}^{-2} \text{s}^{-1}$  means that 3.6  $\text{mmol}$  are available  
122 for utilisation in subsequent time intervals in the model. Both,  $\text{CO}_2$  uptake (grey line) and  
123 RuBisCO flux (orange) were predicted to follow the light curve and peaked at midday  
124 coinciding with light availability. Carboxylic acid levels (magenta area) peaked before midday  
125 and remained low from before sunset to dawn. Starch (green area) accumulated during day-  
126 time hours and was subsequently degraded to sustain metabolism at night. Overall, the  
127 described flux patterns were characteristic for C<sub>3</sub> leaf metabolism. From this starting point we  
128 then asked the question: how will the metabolic fluxes change if we change the optimality  
129 criterion from maximizing phloem output to minimizing water loss?

130

### 131 *An optimality study reveals trade-offs between productivity and WUE*

132 Computationally, the question of how a system’s behaviour changes when operating between  
133 competing objectives can be tackled by performing a Pareto analysis<sup>16–19</sup>. In our case phloem  
134 output and water-saving represented two competing driving forces. We started the Pareto  
135 analysis from the above described scenario of a mature leaf optimized for maximum phloem  
136 output (i.e. 100% phloem output, here termed Pareto step 1). We then subsequently reduced  
137 the required phloem output in 10%-steps and used minimization of water loss as the primary  
138 optimization objective. Given this setup, we saw an almost linear decrease in water loss with  
139 decreasing phloem output, hence we did not observe any significant water-saving mechanism

140 in our model (Figure 2C top). Inspection of the CO<sub>2</sub> uptake and RuBisCO reaction flux in the  
141 model showed that with decreasing phloem output, the model closed the stomata during the  
142 warmest and driest hours of the day, a phenomenon known as midday depression of  
143 photosynthesis (Figure 2D left column), which was accompanied by a very minor peak of CO<sub>2</sub>  
144 uptake at night.

145 One possible explanation for the lack of water-saving metabolic modes in the model  
146 was that the model was limited by the constraints we applied to mimic C<sub>3</sub> leaf anatomy (e.g.  
147 total vacuolar volume per unit of leaf). To test this, we examined the differences between C<sub>3</sub>  
148 and CAM leaf anatomy and adjusted the vacuolar storage constraints accordingly. Using  
149 morphological data for an average CAM leaf resulted in a 3.1-times larger vacuolar storage  
150 capacity per unit leaf compared to a C<sub>3</sub> leaf. (see Supplementary Text). When repeating the  
151 Pareto analysis using this CAM-morphology, a non-linear relationship between productivity  
152 and water loss emerged and the model predicted almost 50% water-saving at 70% of the  
153 maximum phloem output (Figure 2C bottom). It is worth noticing that the upper limit for the  
154 vacuolar storage capacity had only a very minor impact on the maximum phloem output of the  
155 model. The output at Pareto step 1 for the C<sub>3</sub> leaf model was 99.7% of the phloem output of  
156 the CAM leaf. Therefore, in subsequent analyses we directly compared between the two sets  
157 of simulations.

158 What was causing the non-linearity in the relationship between productivity and water  
159 loss? As in the C<sub>3</sub>-anatomy-constrained model, we observed a closure of the stomata and a  
160 reduction of RuBisCO activity during the hottest and driest hours of the day. However, in  
161 addition to these day-time changes to reduce water loss, we also observed a substantial peak  
162 of CO<sub>2</sub> uptake at night which was accompanied by an accumulation of carboxylic acids in the  
163 vacuole at night and a greater amount of starch stored during the day and degraded at night.  
164 (Figure 2D middle columns). These observations suggested that the model was performing a  
165 CAM or CAM-like cycle in which CO<sub>2</sub> was initially fixed at night and stored in the form of  
166 carboxylic acids. During the day, when sufficient light energy was available, CO<sub>2</sub> was released  
167 from its intermediate storage and re-fixed for triose phosphate synthesis during the day using  
168 RuBisCO and the Calvin Benson cycle. This was confirmed by inspection of the complete set  
169 of predicted fluxes in the model (see Supplementary Text).

170 When inspecting the Pareto frontier, we observed the steepest slope (i.e. the largest  
171 increase in water-saving) between 90% and 100% of the maximum phloem output. At 90%  
172 maximum phloem output the model already switched to CAM-like behaviour and partially  
173 closed the stomata during the day and reopened them for a short period at night. Comparing  
174 this to the almost linear Pareto frontier for the C<sub>3</sub> leaf indicated that the additional effect of  
175 night-time CO<sub>2</sub>-fixation contributed largely to the water-saving.

176  
177 *Vacuolar storage capacity limits WUE and influences the extent of phases II and IV*  
178 *of the CAM cycle*

179 When investigating the CO<sub>2</sub> uptake at different steps along the Pareto frontier it became  
180 apparent that the model did not exhibit a full CAM-cycle (Figure 2D middle columns). The  
181 stomata closed only for a few hours in the day and re-opened only for a short period at night.  
182 The sharp CO<sub>2</sub> uptake peak at night-time can be explained by three factors. First, the applied  
183 RH and T curves have a sharp local maximum and minimum (see Figure 2A). This occurs  
184 where the lower and upper ends of the normal curves meet to close a diel cycle. Secondly,  
185 our model is anticipating: i.e., the solution for time-point t depends on the environmental  
186 parameters to be encountered at time-point t+1. Thirdly, the upper-bound on the rate of CO<sub>2</sub>



187 uptake was based on the largest CO<sub>2</sub> uptake rates measured. Therefore, very high rates over  
188 a short period were permitted, whereas in reality, under most conditions and in most species,  
189 CO<sub>2</sub> diffusion constraints would cause that CO<sub>2</sub> is fixed at lower rates but for a longer duration.  
190 These factors led to the observed behaviour where CO<sub>2</sub> uptake showed a short burst when  
191 water loss through transpiration was the lowest.

192 During the day, the stomata remained open for CO<sub>2</sub> exchange during the early hours  
193 of the day and re-opened in the evening hours before sunset. This behaviour was exhibited  
194 for all Pareto steps meaning that night-time CO<sub>2</sub>-fixation alone was not sufficient to sustain the  
195 required phloem output. The observed opening and re-opening of the stomata during the day  
196 occurs in certain CAM species and is known as phase II and IV of the CAM cycle<sup>3</sup>. Night-time  
197 stomata opening for CO<sub>2</sub>-uptake and day-time stomata closure are referred to as phases I and  
198 III, respectively. Some CAM species show a remarkable plasticity with respect to these four  
199 phases and the reasons for the occurrence and extent of these distinct patterns is still debated  
200<sup>20–22</sup>. Given the indication that vacuolar storage capacity had a major impact on the night-time  
201 CO<sub>2</sub> uptake pattern in the model and the fact that some CAM species exhibit a bi-phasic CAM  
202 cycle we wondered if we might underestimate the vacuolar storage capacity of an average  
203 CAM leaf. We therefore repeated the Pareto analysis using the same model but without any  
204 vacuolar storage constraints. The results of this analysis are shown in Figure 2D, right column.  
205 Without any limitation of the vacuolar storage capacity the model performed a bi-phasic full  
206 CAM cycle at 70% of the maximum productivity and below i.e. the stomata remained closed  
207 during the day and were open throughout the night, without the appearance of phase II and  
208 IV of the CAM cycle. *Therefore, our model suggested that keeping the stomata open for at  
209 least a portion of the day was necessary to sustain a high productivity when vacuolar storage  
210 capacity is limiting.*

211

### 212 *Night-time C-fixation by ICDH contributes to WUE*

213 The occurrence of the four phases of CAM in our model raised the question of how metabolic  
214 fluxes were distributed during these metabolically distinct phases. To analyse the underlying  
215 flux modes in more detail we focused the analysis on a model with a vacuolar storage capacity  
216 of a CAM leaf at 70% of maximum productivity (phloem output) optimized for water-saving.  
217 We chose this value, as a yield penalty of 30% would be an acceptable trade-off if water usage  
218 could be reduced by almost half. We followed the flux of CO<sub>2</sub> (including bicarbonate) from the  
219 stomata through the metabolic system by plotting time-resolved fluxes of all reactions that use  
220 CO<sub>2</sub> or bicarbonate as either a reactant or product (Figure 3A left). During the day, RuBisCO  
221 fixed the majority of CO<sub>2</sub> available from gas-exchange and released by metabolic processes.  
222 Cytosolic isocitrate dehydrogenase (ICDH), glycine oxidation in the photorespiratory pathway  
223 (glycine decarboxylase), carbamate kinase in N metabolism and NADP-malic enzyme in the  
224 cytosol were the main CO<sub>2</sub>-releasing processes during the day. To our surprise, we found that  
225 night-time CO<sub>2</sub> fixation in the model was shared between two enzymes — PEP-carboxylase  
226 (PEPC) in the cytosol and ICDH in the mitochondria. While PEPC's role in CAM  
227 photosynthesis is well established, mitochondrial ICDH activity has not been previously linked  
228 to this metabolic cycle. In order for ICDH to be used for CO<sub>2</sub> fixation it has to operate in the  
229 reverse direction to its conventional direction in the TCA cycle. This is possible given an  
230 appropriate mass action ratio (e.g. due to a high 2OG concentration) and indeed this reaction  
231 has been shown to operate in the reverse direction in several *in vivo* metabolic flux studies in  
232 developing rapeseed and soybean embryos<sup>23–25</sup>. ICDH has also been suggested as a  
233 kinetically acceptable option for synthetic carbon fixation pathways ( $\Delta G = 21 \text{ kJ mol}^{-1}$  at pH 7,

234 ionic strength of 0.1 M, and reactant concentrations of 1 mM<sup>26,27</sup>). For convenience, we refer  
235 to this reaction as  $ICDH_{rev}$ .

236 Analysis of the linker fluxes revealed that citrate and/or isocitrate were the sole  
237 carboxylic acid to accumulate at night (Accumulation of either citrate or isocitrate or of both  
238 carboxylic acids resulted in the same phloem output and water-saving.). Additionally, two  
239 amino acids accumulated — Asn during the night and Pro during the day (Figure 3B left). None  
240 of the other linker reactions in the vacuole carried a significant flux. Closer inspection of the  
241 metabolic fluxes revealed an alternative CO<sub>2</sub> fixation pathway where both PEPC and ICDH  
242 contribute to night-time CO<sub>2</sub>-fixation. An overview of the reactions involved is shown in Figure  
243 4A.

244 At night, when the stomata are open and CO<sub>2</sub> can enter the leaf, PEPC catalyses the  
245 fixation of CO<sub>2</sub> to PEP (marked as *(I)* in Figure 4A). The resulting oxaloacetate (OAA) together  
246 with glutamate was converted to 2OG and Asp by aspartate aminotransferase (*(II)*). Asp was  
247 converted to Asn and stored in the vacuole (*(III)*). 2OG was translocated to the mitochondria as  
248 a substrate for  $ICDH_{rev}$  which catalyses the carboxylation of 2OG to isocitrate (*(IV)*) which was  
249 either directly stored in the vacuole or further converted to citrate and then stored in the  
250 vacuole for day-time usage (*(V)*). Additionally, conversion of the vacuolar pool of Pro to 2OG  
251 supported the flux through ICDH in the mitochondria (*(VI)*). *Net, this pathway — starting from*  
252 *PEP to the carboxylic acids stored in the vacuole — can fix one mol of CO<sub>2</sub> per mol stored*  
253 *(iso-)citrate or Asn.*

254 During the day, (iso-)citrate from the vacuole was converted to 2OG and CO<sub>2</sub> by  
255 cytosolic ICDH and CO<sub>2</sub> was refixed in the Calvin-Benson-Bassham (CBB) cycle (*(VII)*) and  
256 ultimately stored as starch to then support night-time metabolism. 2OG was converted to Pro  
257 and stored in the vacuole for the next night-time period (*(VIII)*).

258 Does the shared night-time carbon fixation between PEPC and ICDH represent an  
259 advantage and if so to what extent is it more beneficial than using PEPC alone? To answer  
260 this question, we set ICDH to be irreversible in the conventional forward direction ( $ICDH_{irrev}$ )  
261 and re-ran the simulations. We found that the additional carboxylating activity of ICDH  
262 increased water-saving by 2% (for this particular set of parameters). *From these observations*  
263 *we concluded that night-time C-fixation by ICDH in combination with day-time storage of Pro*  
264 *as a precursor for 2OG might act as an additional water-saving mechanism by adding to the*  
265 *temporal separation of initial CO<sub>2</sub> fixation and the activity of the CBB cycle.*

266

267 *PEPC also fixes CO<sub>2</sub> in the early hours of the day when ICDH is irreversible*

268 How do the metabolic fluxes in our model differ when  $ICDH_{rev}$  is not available for C-fixation  
269 and how does it affect WUE? A first inspection of the metabolic fluxes for this scenario  
270 revealed that making ICDH irreversible had a major impact on the accumulation pattern of  
271 both carboxylic acids and starch (Figure 3B right). While the overall diel pattern of carboxylic  
272 acid accumulation and degradation was very similar in the two scenarios, the individual  
273 patterns for malate and (iso-)citrate were different. When ICDH was irreversible, we observed  
274 both malate and (iso-)citrate accumulation at night and a drop of malate levels in the early  
275 hours of the day together with an increase of (iso-)citrate levels in the morning hours. Day-  
276 time starch levels were more than twice as high as in the scenario where ICDH is reversible  
277 and the onset of starch accumulation was shifted towards the later hours of the morning. Pro  
278 and Asn did not accumulate. Closer inspection of the flux routes involved in the C-fixation  
279 cycle revealed differences between the two scenarios (Figure 4B). At night, PEPC fixed CO<sub>2</sub>  
280 to PEP and formed OAA which was partially converted to malate and stored in the vacuole (*(I)*)

281 and partially transported to the mitochondria. Additionally, PEP was converted to acetyl-CoA  
282 which released one mol CO<sub>2</sub> per mol acetyl-CoA (II). This loss of CO<sub>2</sub> was compensated by  
283 the activity of citrate synthase in the mitochondrion which converted acetyl-CoA and OAA to  
284 citrate (III) which was then stored in the vacuole as citrate or isocitrate. Therefore, the  
285 synthesis of (iso-)citrate from PEP is C-neutral. *Net, this pathway — starting from PEP to the*  
286 *carboxylic acids in the vacuole — can store 1 mol of CO<sub>2</sub> per mol malate and it refixes one*  
287 *mol of CO<sub>2</sub> (which was lost during PEP to acetyl-CoA conversion) and stores it as (iso-)citrate.*  
288 *In contrast — when both ICDH and PEPC were active — both, malate and Asp contributed to*  
289 *C-fixation. Therefore, in terms of CO<sub>2</sub>-fixation capacity the pathway was less efficient than*  
290 *using both PEPC and ICDH.*

291 During the day the two models showed marked differences in the flux routes between  
292 phase II and phase III of the CAM cycle. While model *ICDH<sub>rev</sub>* predicted that CO<sub>2</sub> fixation  
293 through PEPC was limited to night-time, model *ICDH<sub>irrev</sub>* showed additional PEPC activity  
294 during phase II in parallel with RuBisCO (Figure 3A right). This early morning PEPC activity  
295 increased the amount of CO<sub>2</sub> that could be transiently stored in the vacuole until sufficient light-  
296 energy was available for starch synthesis. PEPC used PEP delivered from the CBB cycle as  
297 a substrate (IV) to generate OAA. At the same time malate was released from the vacuole and  
298 converted to OAA by malate dehydrogenase in the peroxisome (V). A part of the OAA pool  
299 and acetyl-CoA were substrates for citrate synthase in the peroxisome (VI). The other part of  
300 the OAA pool, together with GLT, was used by an aminotransferase to generate 2OG and Asp  
301 in the cytosol (VII). Asp was further metabolized and the downstream product acetyl-CoA (see  
302 sequence of reactions in Supplementary Text) acted as a precursor for the synthesis of citrate  
303 by citrate synthase. (Iso-)Citrate replaced malate in the vacuole. PEPC is known to be active  
304 in phase II<sup>28,29</sup>, however subsequent metabolic flux modes in the model were different from  
305 the canonical CAM cycle where malate is decarboxylated to PEP or pyruvate by  
306 phosphoenolpyruvate carboxykinase or malic enzyme. Later during phase III, (iso-)citrate was  
307 released from the vacuole and supplied CO<sub>2</sub> for the CBB cycle via a degradation route that  
308 involved the glycine decarboxylase system in the mitochondria (VIII) (reaction sequence in  
309 Supplementary Text). To test if the observed malate to (iso-)citrate exchange in the vacuole  
310 during phase II of the CAM cycle was indeed a water-saving advantage, we simulated a  
311 scenario where (iso-)citrate uptake into the vacuole was blocked during the day (termed *model*  
312 *ICDH<sub>irrev</sub>, Cit<sub>night</sub>*). This constraint increased water usage at 70% productivity by 1.1%.

313

### 314 *High enzyme costs might outweigh the water-saving effect of alternative flux routes*

315 The occurrence of specific metabolic patterns was not only determined by water-use efficiency  
316 but also by the cost for enzyme synthesis. In our analysis, this metabolic investment was only  
317 indirectly considered by minimizing the metabolic flux sum after the leaf productivity and water  
318 loss had been determined. Therefore, flux minimization did not represent a competing  
319 objective on the Pareto frontier and a slightly more water-efficient solution with a high  
320 enzymatic investment (high flux sum) would always be preferred over a slightly worse  
321 performing mechanism with less enzyme investment. To account for this bias, we considered  
322 the metabolic flux sum for the three models — *ICDH<sub>rev</sub>*, *ICDH<sub>irrev</sub>*, and *ICDH<sub>irrev</sub>, Cit<sub>night</sub>*. The  
323 values were 11,455, 13,001, and 11,350 μmol m<sup>-2</sup> s<sup>-1</sup>, respectively. As a second indicator for  
324 metabolic efficiency we considered the overall ATP budget, that is all ATP produced and  
325 consumed over the course of the day (Supplementary Text, Supplementary Figure 1). These  
326 values indicated the highest ATP turnover of 882 μmol m<sup>-2</sup> s<sup>-1</sup> for model *ICDH<sub>irrev</sub>* and lower  
327 values of 806 and 796 μmol m<sup>-2</sup> s<sup>-1</sup> for models — *ICDH<sub>rev</sub>* and *ICDH<sub>irrev</sub>, Cit<sub>night</sub>*, respectively.

328 From these observations we conclude that the additional metabolic cost of exchanging malate  
329 for (iso-)citrate in the phase II of the CAM cycle would very likely outweigh the water-saving  
330 effect of this mechanism. On the other hand, the other two modelling scenarios — model  
331  $ICDH_{rev}$  and model  $ICDH_{irrev,Cit\_night}$  had similar metabolic flux sums as well as ATP budgets,  
332 indicating that ICDH's contribution to CO<sub>2</sub>-fixation might indeed be a feasible prediction with  
333 respect to enzyme cost.

334

### 335 *CAM's WUE depends on the environment*

336 So far, we have focused our analysis on one particular environmental scenario. In the next  
337 step we used the model to study the impact of different environments on the trade-off between  
338 productivity and WUE focusing on two questions: in which environments is the introduction of  
339 a CAM-cycle of the greatest advantage? and how does the contribution of ICDH to C-fixation  
340 impact WUE in different environments? To systematically scan the space of possible  
341 environments we chose three alternative light regimes with a maximum of 250, 500 and 1000  
342  $\mu\text{mol m}^{-2} \text{s}^{-1}$  and three different day:night-time ratios, i.e., 16:8, 12:12 and 8:16. For each of  
343 these nine combinations we then scanned for combinations of  $RH_{min}$  and  $RH_{max}$  between 0.3  
344 and 0.9 and across a temperature regime with night-time temperatures between 0 and 30°C  
345 and day-time temperatures between 0 and 50°C (Figure 5A, Supplementary Table 2). For  
346 each of these conditions we simulated model  $ICDH_{irrev}$  and model  $ICDH_{rev}$  and analysed the  
347 resulting CAM-like behaviour at 70% of the maximum phloem output (100% phloem output  
348 corresponds to C<sub>3</sub> metabolism). We determined the absolute water loss, the relative water loss  
349 with respect to the C<sub>3</sub> model, and the difference between model  $ICDH_{rev}$  and model  $ICDH_{irrev}$ .  
350 From these analyses we made the following observations: Overall, we found that for the  
351 investigated environmental conditions, the relative water loss at 70% productivity with respect  
352 to a C<sub>3</sub> leaf ranged between 31 and 67 % and the additional water-saving effect of  $ICDH_{rev}$   
353 reached up to 4%. As an example, the results for a set of simulations for a maximum light  
354 intensity of 250  $\mu\text{mol m}^{-2} \text{s}^{-1}$ , a 12:12 day:night-time ratio and a fixed  $RH_{max}$  of 0.9 are shown  
355 in Figure 5B and will be analysed further.

356

357 *Absolute water loss is the highest for high T and low RH values.* The model predicted the  
358 highest absolute water loss for low RH and high T. This behaviour was to be expected from  
359 the gas-diffusion relationship between the system's demand for CO<sub>2</sub> and the resulting water  
360 loss through transpiration. In Figure 5B this relationship is illustrated by the orange heatmaps,  
361 which represent the absolute water loss experienced by both models —  $ICDH_{rev}$  (left) and  
362  $ICDH_{irrev}$  (middle) for all analysed combinations of  $T_{min}$  (y-axis) and  $T_{max}$  (x-axis) values for three  
363 different  $RH_{min}$  values (0.3, 0.5, 0.7). The darker the colours the higher absolute water loss.  
364 For example, at RH between 0.5 and 0.9,  $T_{min} = 10^\circ\text{C}$  and  $T_{max}$  between 20 and 30°C water  
365 loss increased by 60 and 61%, respectively. Furthermore, we observed that the day-time  
366 temperature  $T_{max}$  was the main driver for water loss as the colour gradient changed more along  
367 the x-axis than along the y-axis. This could be explained by the occurrence of phase II and IV  
368 of the CAM cycle in our model. During these two phases the stomata opened during the day  
369 and water-loss was much higher than at night in phase I. This was also reflected in the effect  
370 of relative humidity on water loss. We found that the effect of the day-time humidity  $RH_{min}$  on  
371 the absolute water loss was stronger than the effect of  $RH_{max}$  (A comparative plot for changing  
372  $RH_{max}$  is shown in the Supplementary Text, Figure 2). For example, water loss was 1.9-fold  
373 higher at  $RH_{min} = 0.3$  as compared to  $RH_{min} = 0.7$  at  $T_{min} = 10^\circ\text{C}$ ,  $T_{max} = 30^\circ\text{C}$  and  $RH_{max} = 0.9$ .  
374 The difference in the absolute water loss between model  $ICDH_{rev}$  and model  $ICDH_{irrev}$  was



375 largest for combinations of low  $T_{\min}$  and high  $T_{\max}$  (darkest areas in the green heatmap in Figure  
376 5B) and for the highest  $\Delta RH$  value, i.e.  $RH_{\min} = 0.3$  and  $RH_{\max} = 0.9$ . Therefore, with respect  
377 to absolute water-saving, model  $ICDH_{rev}$  outperformed model  $ICDH_{irrev}$  the most for high day-  
378 and low night-time temperatures and large RH differences between day and night.

379  
380 *Relative water loss is the highest for small diel temperature ( $\Delta T$ ) and high RH changes ( $\Delta RH$ ).*  
381 Next, we considered the relative water loss with respect to the  $C_3$  leaf which is illustrated in  
382 the blue heatmaps (Figure 5B). Here, we found that the relative water loss was the lowest for  
383 combinations of low night-time temperatures and high day-time temperatures. This  
384 observation could be explained by the fact that low night-time temperatures benefited the  
385 water-saving for a CAM-like leaf but had little impact on the water-loss of a  $C_3$  leaf which closed  
386 the stomata during the night. Conversely, this holds true for high day-time temperatures. We  
387 also observed that high  $\Delta RH$  values drove high water loss. Finally, the red heatmaps show  
388 the difference in relative water loss with respect to the  $C_3$  model between model  $ICDH_{rev}$  and  
389  $ICDH_{irrev}$ . The plot reveals differences in the contribution of  $ICDH_{rev}$  to the water-saving  
390 potential of the CAM-cycle. As with the absolute water loss, the contribution was the highest  
391 for environments with high day-time and low night-time temperatures and environments with  
392 low RH values. However, in contrast to the difference in absolute water-saving, the difference  
393 in relative water-saving was high across a large range of conditions (as can be seen by the  
394 dark colours for most parameter combinations). This indicated that for most of the encountered  
395 conditions  $ICDH_{rev}$  can have a significant contribution to relative water-saving with respect to  
396 a  $C_3$  plant.

397  
398 *Day length and light intensity impact water loss.* In addition to T and RH, we investigated the  
399 influence of different light intensities and day-light hours on water loss. We found a strong  
400 effect of light intensity on the additional relative water-saving potential of running the isocitrate-  
401 citrate-proline-2OG cycle and we observed that for higher light intensities this effect  
402 diminishes. Changing day-time hours also had an effect on the relative water-saving potential  
403 of  $ICDH_{rev}$  and can make a difference of up to 4% for short days where it only reached 2% for  
404 long days. Plots showing the water loss as dependent on light intensity and day length are  
405 shown in Supplementary Figure 3 and 4, respectively.

406

## 407 Discussion

408 The time-resolved, environment-coupled model of leaf metabolism allowed us to study the  
409 trade-offs between productivity and water-saving for different network configurations and  
410 across different environmental conditions in a systematic manner. Our analysis led to three  
411 main conclusions. First, the leaf's vacuolar storage capacity is a major determinant of the  
412 extent of a CAM cycle and without engineering a higher vacuole to cytoplasm ratio it will be  
413 unlikely that a full CAM cycle can be engineered into a  $C_3$  leaf. Secondly, the reversibility of  
414 mitochondrial ICDH might contribute to initial carbon fixation at night-time. This operational  
415 mode of the TCA cycle was previously demonstrated by metabolic flux analysis in rapeseed  
416 and soybean embryos<sup>23,24</sup> but is a novel prediction with respect to nocturnal  $CO_2$  assimilation.  
417 Thirdly, the water-saving effect of CAM strongly depends on the environment and the  
418 additional water-saving effect of carbon fixation by ICDH can range between 0.1 and 4% for  
419 the environmental conditions tested here. The additional water-saving contribution is largest  
420 at lower light intensities and for broad ranges of temperature and relative humidity which

421 makes it an interesting candidate for metabolic engineering approaches as these should be  
422 beneficial for many weather conditions typically encountered by C<sub>3</sub> crops.

423

424 *Reduced photorespiration due to daytime stomata closure can increase the water-*  
425 *saving potential of CAM leaves*

426

427 Our previous study on CAM photosynthesis investigated the energetics and productivity of  
428 metabolic networks operating in C<sub>3</sub> and CAM. It was found that — depending on the rates of  
429 the carboxylase and oxygenase activities of RuBisCO — the productivity of a CAM network  
430 could reach between 74 - 100% of the C<sub>3</sub> network<sup>13</sup>. In the analysis presented here, we  
431 focused on the water-saving potential of CAM without considering the potentially positive effect  
432 of carbon concentration behind closed stomata during the day. As we do not know how the  
433 carboxylation to oxygenation ratio changes as we move along the Pareto frontier from open  
434 stomata to partial and full closure during the daytime we used a constant value of 3:1.  
435 Therefore the implications of our analysis can be regarded as a conservative estimate. Due to  
436 the suppression of photorespiration in a leaf operating in CAM mode the actual water-saving  
437 potential at the same productivity level is expected to be higher than calculated here.

438

439 *ICDH might play a role in facultative CAM photosynthesis*

440 Diel cycles of Pro accumulation have been previously observed in ice plant exposed to CAM-  
441 inducing salt stress. Under this stress condition Pro is known to act as an osmoprotectant. It  
442 has been reported that Pro accumulation proceeded in an oscillating manner in which high  
443 levels of Pro accumulated during the day (up to 16 μmol gFW<sup>-1</sup>), followed by a partially  
444 degradation at night which led to steadily increasing Pro levels during the CAM-induction  
445 phase<sup>30</sup>. The increase in Pro levels was accompanied by an increase in PEPCase mRNA up  
446 to 10 days after stress exposure when PEPC mRNA has reached a full CAM level. This  
447 oscillatory behaviour led the authors to the following statement “Changes of proline in light  
448 and darkness suggested that proline plays an important role in addition to serving as an  
449 osmolyte.” but they offered no further explanation of what this role could be. We suggest that  
450 in addition to its function as an osmoprotectant during the day, Pro degradation at night might  
451 support C-fixation by supplying the substrate 2OG for citrate synthesis through ICDH in the  
452 mitochondria. Once PEPC capacity has been induced to the level required for full CAM the  
453 initial CO<sub>2</sub>-fixation proceeds via this enzyme, as it is kinetically superior, catalysing a  
454 thermodynamically favourable reaction compared to *ICDH<sub>rev</sub>* ( $\Delta G = -40\text{kJ mol}^{-1}$  at pH 7, ionic  
455 strength of 0.1 M, and reactant concentrations of 1 mM<sup>27</sup>).

456 This conclusion is further supported by another study in ice plant in which malate,  
457 citrate and isocitrate levels and CAM-relevant enzyme activities were measured for the same  
458 CAM-inducing conditions<sup>5</sup>. The authors reported malate and citrate levels of up to 27.5 mM  
459 and 29.4mM, respectively. Isocitrate levels were about 10 times lower than citrate levels.  
460 These observations are in line with our model's predictions of carboxylic acid storage.  
461 Moreover, in accordance with previous reports<sup>31</sup> the authors found citrate accumulation to  
462 precede malate accumulation throughout the CAM induction period. Enzymes essays  
463 revealed an increased night-time activity of mitochondrial citrate synthase towards the end of  
464 the induction period. These findings support the prediction that (iso-)citrate synthesis through  
465 citrate synthase increases as PEPC concentrations reach full CAM level.

466

467 *Considerations of enzyme cost could improve flux mode predictions*

468 Our analysis explored the water-saving potential of alternative flux routes without accounting  
469 for the enzymatic cost of different flux routes. Previous modelling approaches in bacteria and  
470 cyanobacteria have successfully included a cost for enzyme synthesis in the form of a  
471 'resource allocation' or 'resource balance' problem<sup>32–35</sup>. However, these or similar modelling  
472 approaches rely on comprehensive knowledge of  $k_{cat}$  and enzyme turnover rates or large  
473 datasets to estimate such parameters and therefore are still of limited applicability for large-  
474 scale plant metabolic models.

475

#### 476 *Implications for engineering CAM into a C<sub>3</sub> species in temperate climates*

477 Strategies for introducing CAM into crop plants to make them more resilient to hotter and drier  
478 conditions have been largely discussed in the context of arid or marginal lands<sup>36–38, 236–38</sup>.  
479 Less attention has been given to the question of whether CAM could benefit the productivity  
480 of C<sub>3</sub> species typically grown in temperate climates, such as wheat or barley, where hot and  
481 dry periods are becoming increasingly frequent<sup>39,40</sup>. In this context a flexible CAM i.e. a  
482 'C<sub>3</sub>+CAM' phenotype could be beneficial as it combines high productivity in C<sub>3</sub> mode with  
483 increased WUE in CAM mode. Besides the challenge of engineering a CAM cycle into a C<sub>3</sub>  
484 crop, other factors such as the trade-off between improved WUE and potential constraints on  
485 leaf productivity due to anatomical changes or the response of CAM to increasing CO<sub>2</sub> levels  
486 need consideration<sup>41</sup>. However, naturally occurring CAM has two characteristics that make it  
487 a suitable target for engineering approaches for crops grown in temperate regions. First, the  
488 CAM syndrome is extremely flexible. It has been shown that the contribution of CAM to diel  
489 CO<sub>2</sub> uptake patterns can range between 0 and 100%, particularly in plants with either  
490 ontogenetically or environmentally induced transition from C<sub>3</sub> to CAM<sup>41</sup>. Secondly, CAM has  
491 evolved many times independently and it is believed to be present in well over 5% of vascular  
492 plant species<sup>42,43</sup>. These observations can be attributed to the fact that CAM most likely  
493 evolved on a 'biochemistry first, anatomy second' trajectory<sup>44</sup> in which 'C<sub>3</sub>+CAM' is an  
494 evolutionarily accessible phenotype on the trajectory to strong CAM<sup>45,46</sup>. Our model  
495 demonstrates the water-saving potential of a partial CAM or CAM-like mode for plants grown  
496 in temperate climates, while maintaining a high net metabolic output. In particular, we predict  
497 that the relative additional water-saving of operating an isocitrate-citrate-proline-2OG  
498 nocturnal carbon fixation cycle is significant across a wide range of conditions. To summarize,  
499 our model supports the potential productivity benefits of flexible CAM as it can enable  
500 temperate crops plant to better cope with and survive periods of heat and drought with only  
501 minimal impact upon metabolic productivity.

502

#### 503 *Overcoming vacuolar storage constraints by increasing cell size*

504 Our study identified the vacuolar storage capacity as a limiting factor for introducing CAM into  
505 a C<sub>3</sub> plant. Comparison of models with different vacuolar storage capacities revealed that  
506 shifting from C<sub>3</sub> to CAM leaf anatomy increased water-saving by 6.6 %, given a 3.1-fold  
507 increase in the vacuolar storage capacity. Given this observation, engineering leaf anatomical  
508 parameters of a C<sub>3</sub> leaf towards CAM architecture will be key to increasing water-saving. How  
509 could this be achieved? Several anatomical traits (cell size (as a proxy for vacuole size), %  
510 intercellular airspace (IAS), tissue thickness) have been discussed in this context<sup>44</sup>. However,  
511 altering the latter two parameters could potentially limit photosynthesis in C<sub>3</sub> mode due to  
512 reduced CO<sub>2</sub> diffusion through the mesophyll and a lower  $C_i$ <sup>47</sup> and therefore disadvantage  
513 flexible CAM. Barrera Zambrano et al. proposed that *Clusia* might overcome this discrepancy

514 by having a high % IAS in the spongy mesophyll for efficient CO<sub>2</sub> diffusion in C<sub>3</sub> mode, and  
515 large palisade cells for carboxylic acid storage in CAM mode and suggested this as a potential  
516 engineering strategy for transferring inducible CAM into a C<sub>3</sub> plant<sup>48</sup>. Of particular relevance  
517 is a study which attempted to increase leaf cell size by overexpressing a grape berry  
518 transcription factor (*VvCEB1<sub>opt</sub>*) in *Arabidopsis thaliana* and *Nicotiana glauca*<sup>49</sup>. This  
519 approach increased cell size — but not number — in both species with a 1.8- to 2.3-fold  
520 increase in the palisade mesophyll and 2.0- to 2.5-fold increase in the spongy mesophyll in *A.*  
521 *thaliana*. Assuming that the larger cell size is mainly driven by increased vacuolar volume the  
522 reported increase would suffice to enable partial CAM with high water-saving potential.  
523 Besides increased cell size, the authors also reported a significant decrease in cell wall  
524 thickness — another feature typically observed in CAM plants<sup>36</sup>. Thus, (tissue-specifically)  
525 overexpressing *VvCEB1<sub>op</sub>* in the context of engineering CAM could indeed be a promising  
526 strategy to engineer more drought-resistant crops.

527

## 528 **Materials and Methods**

### 529 *Developing a time-resolved environment-coupled model of leaf metabolism*

530 The model building process was divided into two parts: developing a time-resolved model of  
531 leaf metabolism and modelling the gas-exchange through the stomata. The time-resolved diel  
532 model is an extension of our previously published diel modelling framework<sup>13,50</sup>. Starting from  
533 the latest version of a charge and proton balanced generic core model of plant metabolism  
534 (PlantCoreMetabolism\_v1\_2\_3.xml) we concatenated 24 copies (each representing one hour  
535 of the day) of the model by allowing a range of metabolites to accumulate and to be transferred  
536 from one time-point to the other via so-called '*linker fluxes*'. Starch was allowed to accumulate  
537 freely in the plastid. The sugars glucose, sucrose, and fructose, the carboxylic acids malate,  
538 citrate and isocitrate, the proteinogenic amino acids, and nitrate were allowed to accumulate  
539 in the vacuole. The last time interval of the optimization routine was coupled to the first interval  
540 to form a closed diel cycle. The overall vacuolar storage capacity was based on estimates for  
541 the vacuolar malate storage capacity and the vacuolar volume of an average C<sub>3</sub> plant (see  
542 Supplementary Text for detailed calculations). The specificity of the metabolic network at each  
543 hour of the day was achieved by setting the light input according to the diel light curve and by  
544 constraining the export of sugars and amino acids to the phloem (phloem output) to a day:night  
545 ratio of 3:1 and nitrogen uptake to a day:night ratio of 3:2 according to previous estimates<sup>50</sup>.  
546 Maintenance cost was modelled in a light-dependent manner, where the day-time cost  
547 depends on the average daytime light intensity (Supplementary Text). The day:night ratio was  
548 assumed to be 3:1 and the ratio of ATP maintenance cost to NADPH maintenance cost was  
549 assumed to be 3:1 (Cheung et al., 2013). RuBisCO was only activated during day-light hours.  
550 Due to the lack of knowledge about the RuBisCO carboxylation:oxygenation ratio we used a  
551 value of 3:1 as estimated from flux measurements in *Arabidopsis*<sup>51</sup>. The uptake rate for CO<sub>2</sub>  
552 was limited to a value of 15 μmol m<sup>-2</sup> s<sup>-1</sup> based on values for different C<sub>3</sub> and CAM species at  
553 a light intensity of 250 μmol m<sup>-2</sup> s<sup>-1</sup><sup>52</sup>. All other fluxes were unconstrained. To avoid any bias,  
554 we used both a phloem composition of a C<sub>3</sub> crop plant (tomato, *Arabidopsis*) and a CAM  
555 species (*Opuntia*) and found no qualitative differences in our analysis. The phloem  
556 composition and output values for the *Opuntia* and *Arabidopsis* data-constrained model are  
557 listed in the Supplementary Table 2.

558 Gas-exchange through the stomata was described by a linearized diffusion model  
559 which predicts the water-loss depending on the metabolic model's demand for CO<sub>2</sub>, at a  
560 particular T and RH. The input curves for T and RH are based on a normal distribution function



561 and allowed us to systematically scan a multidimensional parameter space by adjusting the  
 562 function parameters accordingly.

563 The model equations for optimizing phloem output and water-saving were solved as a  
 564 linear optimization problem ( $L_1$  norm). The subsequent minimization of the metabolic flux sum  
 565 was solved as a quadratic optimization problem ( $L_2$  norm) to select from a possible set of  
 566 multiple solutions, the one with the least variation in fluxes between time points. To exemplify  
 567 this, consider a three-time-step model with the flux sequence [1, 1, 1], [2, 0, 1] and [3, 0, 0].  
 568 When applying the  $L_1$  measure all three cases will be weighted with 3 although in the second  
 569 and third case more enzyme needs to be synthesized and degraded and therefore would be  
 570 costlier. The  $L_2$  distance yields values of 3, 5, and 9 and would therefore prefer the flux  
 571 distribution in which fluxes are equally split between the 3 phases. A derivation of the gas-  
 572 water exchange relationship through the stomata, any further modelling assumptions,  
 573 parameter derivations, and auxiliary calculations are detailed in the Supplementary Text.  
 574

## 575 Figures

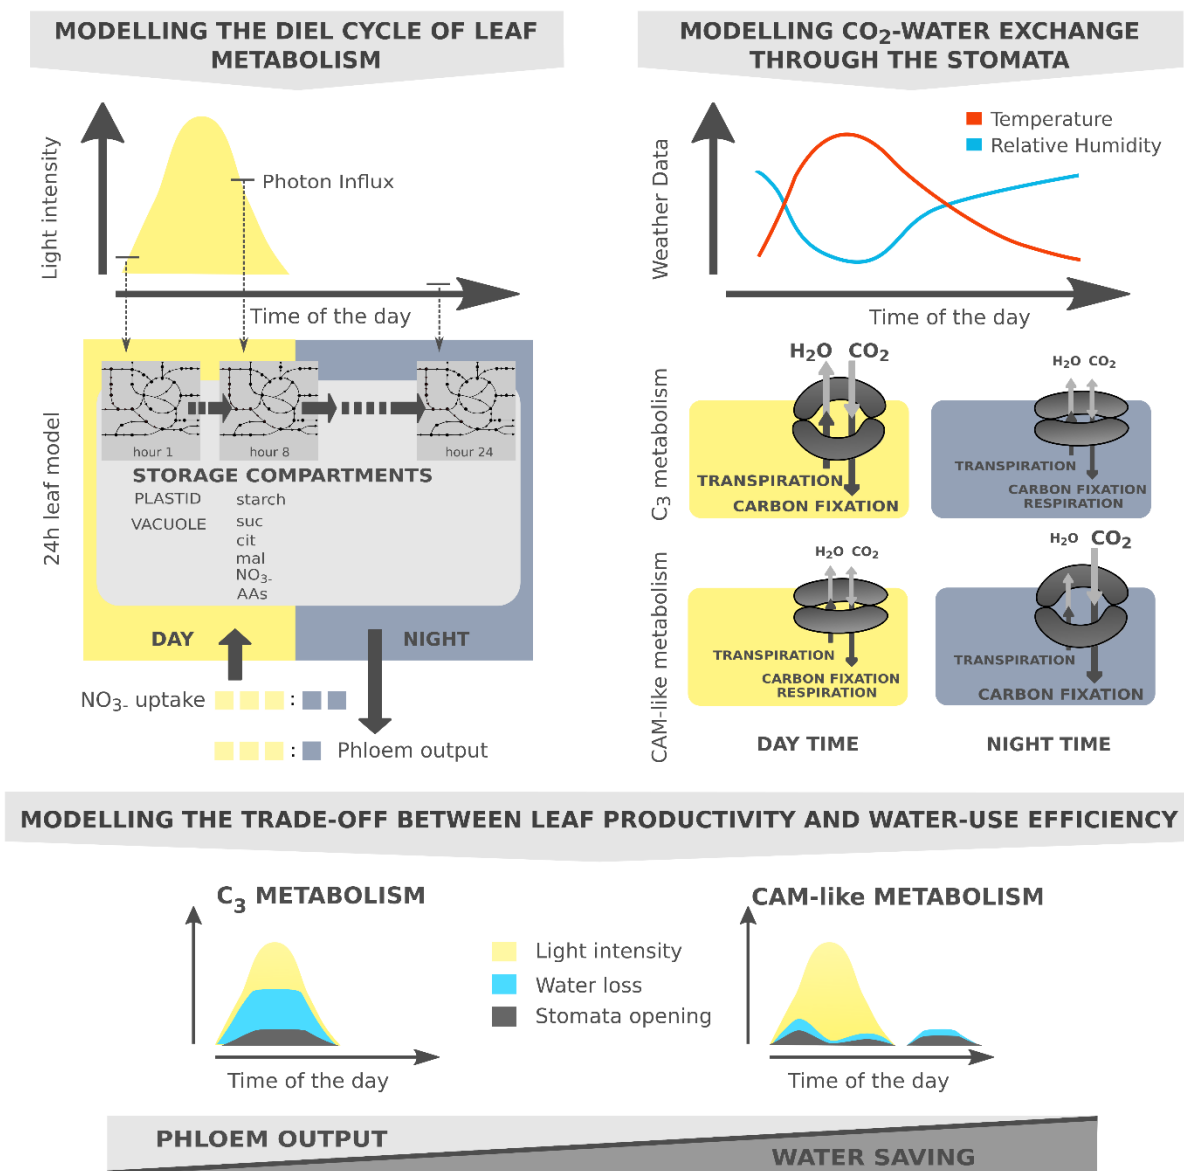

577 **Figure 1: Modelling water-saving flux modes in an environment-coupled model of leaf**  
578 **metabolism.** Upper left: A 24h-leaf model was constructed by concatenating copies of a core  
579 model of plant metabolism<sup>13</sup>. The individual models were connected via 'linker fluxes' which  
580 allowed the transfer of storage compounds in the vacuole and the plastid between successive  
581 models. Light uptake was constrained by the diel light curve. The day:night ratios of phloem  
582 output and maintenance were set to 3:1 for each hour of the diel cycle, and N uptake was  
583 constrained to a ratio of 3:2 based on previous estimates<sup>50</sup>. Upper right: The effect of  
584 temperature T and relative humidity RH on stomatal water loss was modelled by a simplified  
585 gas-diffusion equation. T and RH data determined the relationship between CO<sub>2</sub> uptake and  
586 water loss. In C<sub>3</sub> plants stomata open during the day and CO<sub>2</sub> uptake and water loss are high  
587 due to high T and low RH. At night the stomata are closed and gas/water exchange is  
588 minimized. In CAM plants stomata remain closed during the day and open at night allowing  
589 high CO<sub>2</sub> influx while having a low transpiration stream due to low T and high RH. Bottom:  
590 Combining metabolic and gas-exchange models allows the trade-off between productivity and  
591 water-loss to be studied as competing objectives on a Pareto frontier and reveals alternative  
592 water-saving C-fixation mechanisms.  
593

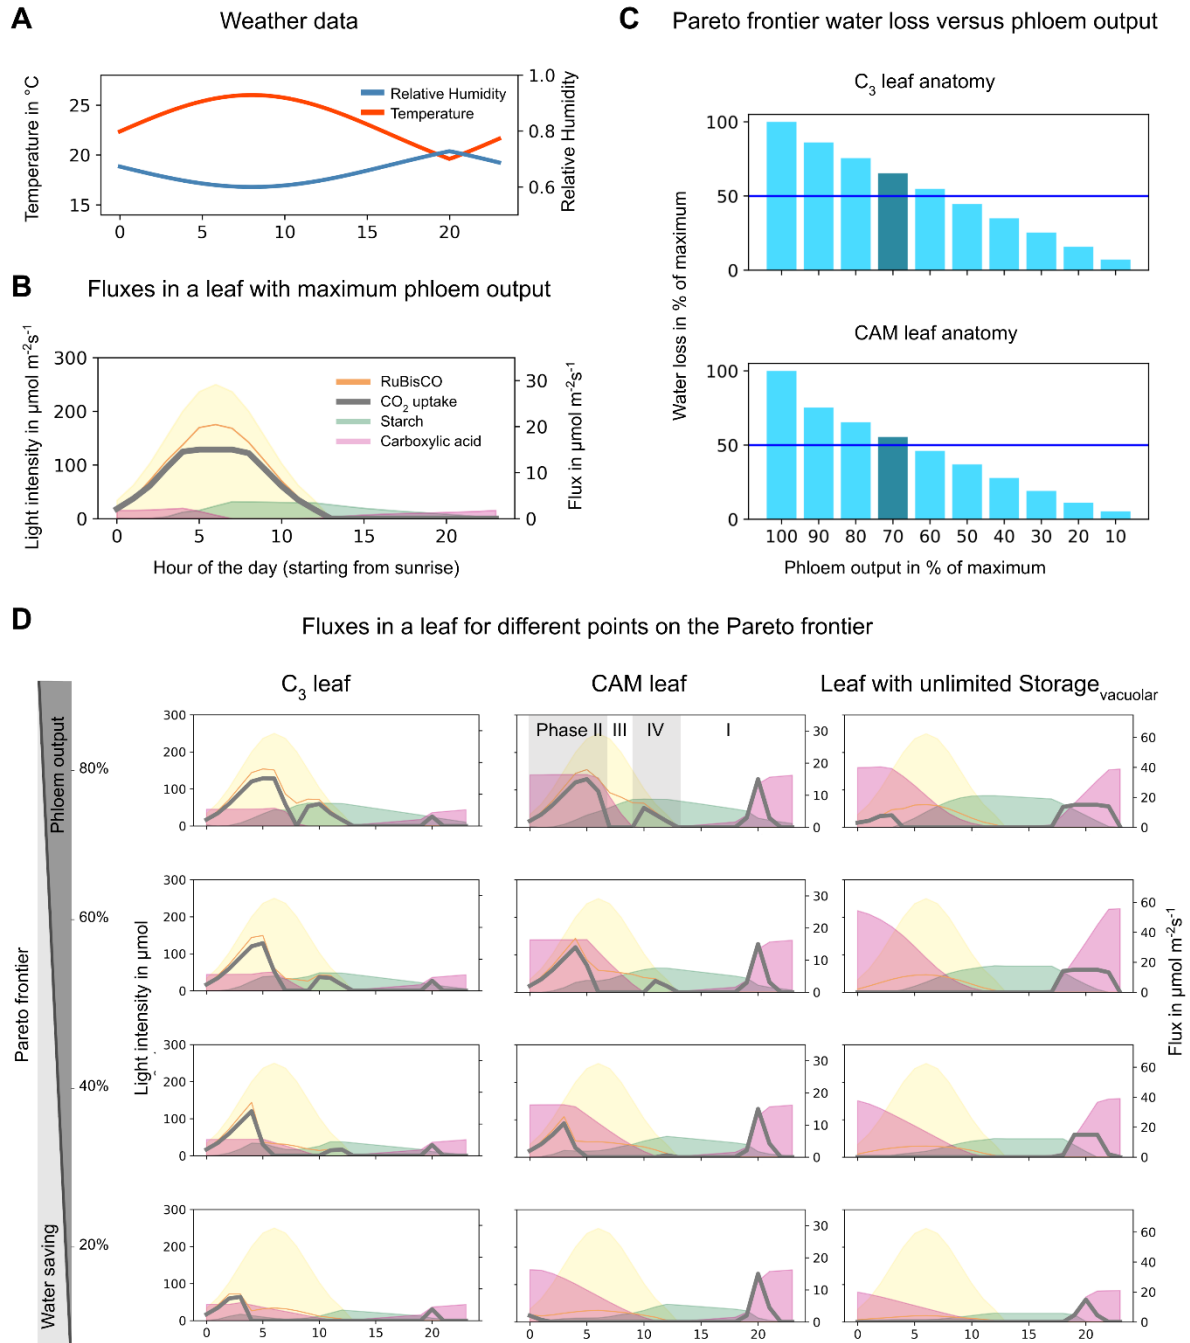

594

595

596

597

598

599

600

601

602

603

604

605

606

**Figure 2: Metabolic fluxes and water loss for different modelling scenarios.** (A) Example weather data used throughout the simulations. (B) Metabolic flux profiles in a C<sub>3</sub> leaf optimized towards phloem output (100% phloem output). The diel light curve is indicated in yellow and peaks at a maximum intensity of 250  $\mu\text{mol m}^{-2}\text{s}^{-1}$ . Selected fluxes for reactions and linker fluxes demonstrate that the model is operating in C<sub>3</sub> photosynthesis mode. (C) Pareto analysis of phloem output versus water-loss in a C<sub>3</sub> leaf (top) and a CAM leaf (bottom). The CAM leaf enabled a better trade-off between the two competing objectives. (D) Metabolic flux profiles for (left) a C<sub>3</sub> leaf, (middle) a CAM leaf, and (right) a leaf with unlimited vacuolar storage capacity for different Pareto steps (80, 60, 40, and 20% of the max phloem output (shown for a C<sub>3</sub> leaf in A)). The C<sub>3</sub> leaf exhibits ‘daytime depression’ behaviour, the CAM leaf exhibits all 4 phases of the CAM cycle (phase I: open stomata at night, phase II: open stomata in the early morning hours, phase III: closed stomata during the day, phase IV: open stomata during

607 evening hours). The leaf with unlimited storage exhibits a full CAM cycle below 80%  
 608 productivity. Note the different flux scales on the right plot axis for the C<sub>3</sub> and CAM leaf and  
 609 the leaf with unlimited storage capacity.  
 610

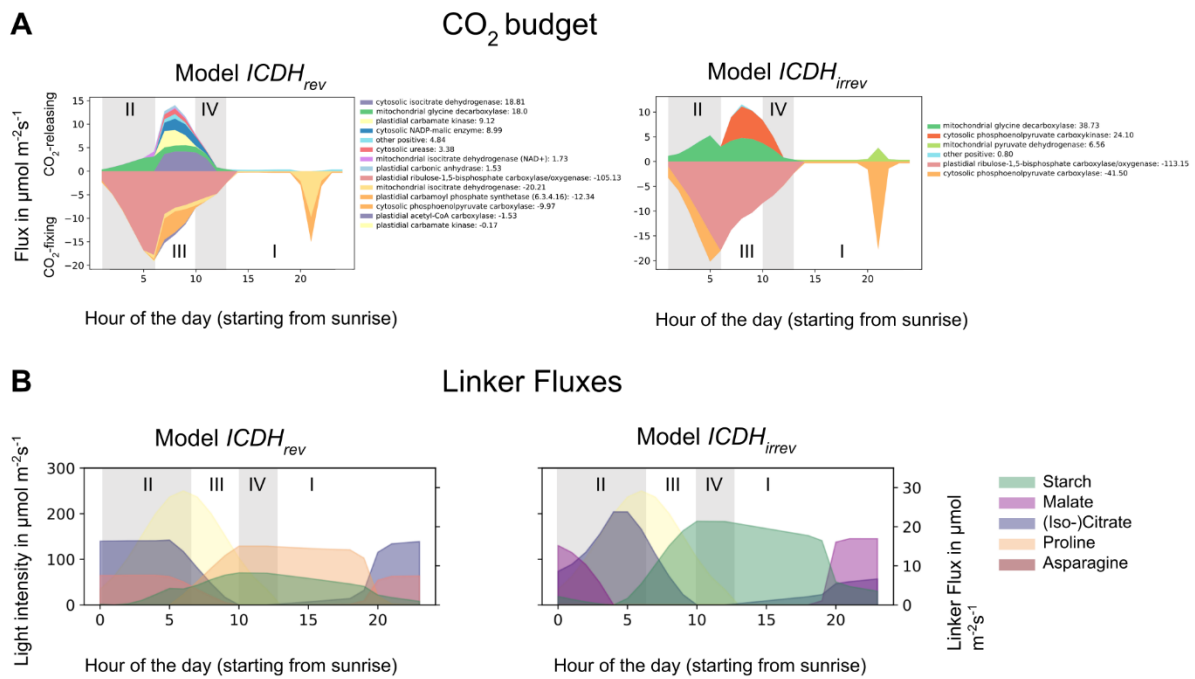

611  
 612 **Figure 3: Different flux distributions in a water-saving CAM leaf at 70% productivity with**  
 613 **(model *ICDH<sub>rev</sub>*) and without (model *ICDH<sub>irrev</sub>*) reversible mitochondrial IDCH. (A) CO<sub>2</sub>**  
 614 **budget for the two models reveals different CO<sub>2</sub> turnover fluxes over the course of the day.**  
 615 **Shown are all reactions with a flux > 0.5 µmol m<sup>-2</sup> s<sup>-1</sup> for at least one time point. I-IV indicates**  
 616 **the 4 phases of the CAM cycle. The values for the cumulative contribution are given next to**  
 617 **the reaction name. (B) Significant linker fluxes for both models. Model *ICDH<sub>rev</sub>* accumulated**  
 618 **(iso-)citrate as carboxylic acids and additionally Pro and Asp. Model *ICDH<sub>irrev</sub>* accumulated**  
 619 **both malate and (iso-)citrate but no amino acids. Starch levels in model *ICDH<sub>irrev</sub>* were almost**  
 620 **three-fold higher than in model *ICDH<sub>rev</sub>*.**  
 621



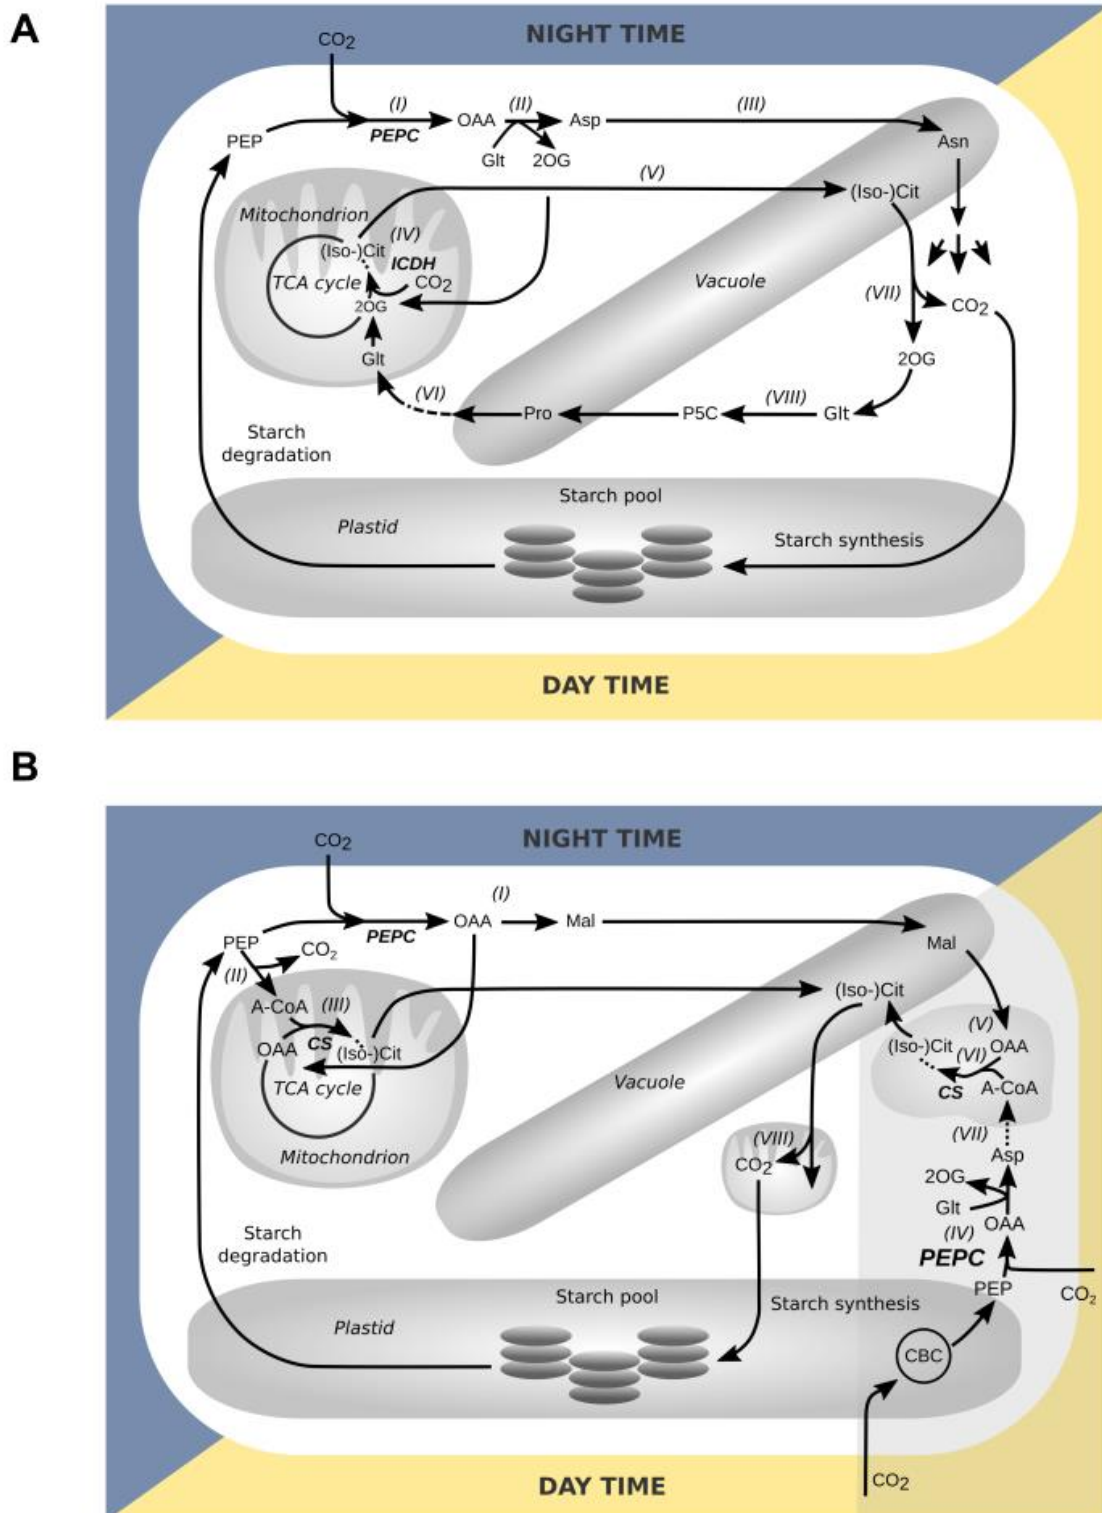

622  
623  
624  
625  
626  
627  
628  
629

**Figure 4: Major flux routes involved in the CAM-like temporally-separated C-fixation mechanism in a water-saving CAM leaf at 70% productivity (A) with (model *ICDH<sub>irrev</sub>*) and B) without (model *ICDH<sub>irrev</sub>*) reversible mitochondrial IDCH. The two models used different pathways to fix and release C. CS, citrate synthase; ICDH, isocitrate dehydrogenase; PEPC, PEP-carboxylase; 2OG, 2-oxoglutarate; A-CoA, acetyl-coenzyme A; Asn, asparagine; Asp, aspartate; (Iso-)Cit, (Iso-)citrate; Glt, glutamate; Mal, malate; OAA, oxaloacetate; P5C, 1-pyrroline-5-carboxylic acid; PEP, phosphoenolpyruvate; Pro, proline; TCA cycle,**

630 tricarboxylic acid cycle; CBC, Calvin-Benson-Bassham cycle. The grey area in B) highlights  
 631 those reactions that are active in phase II.  
 632

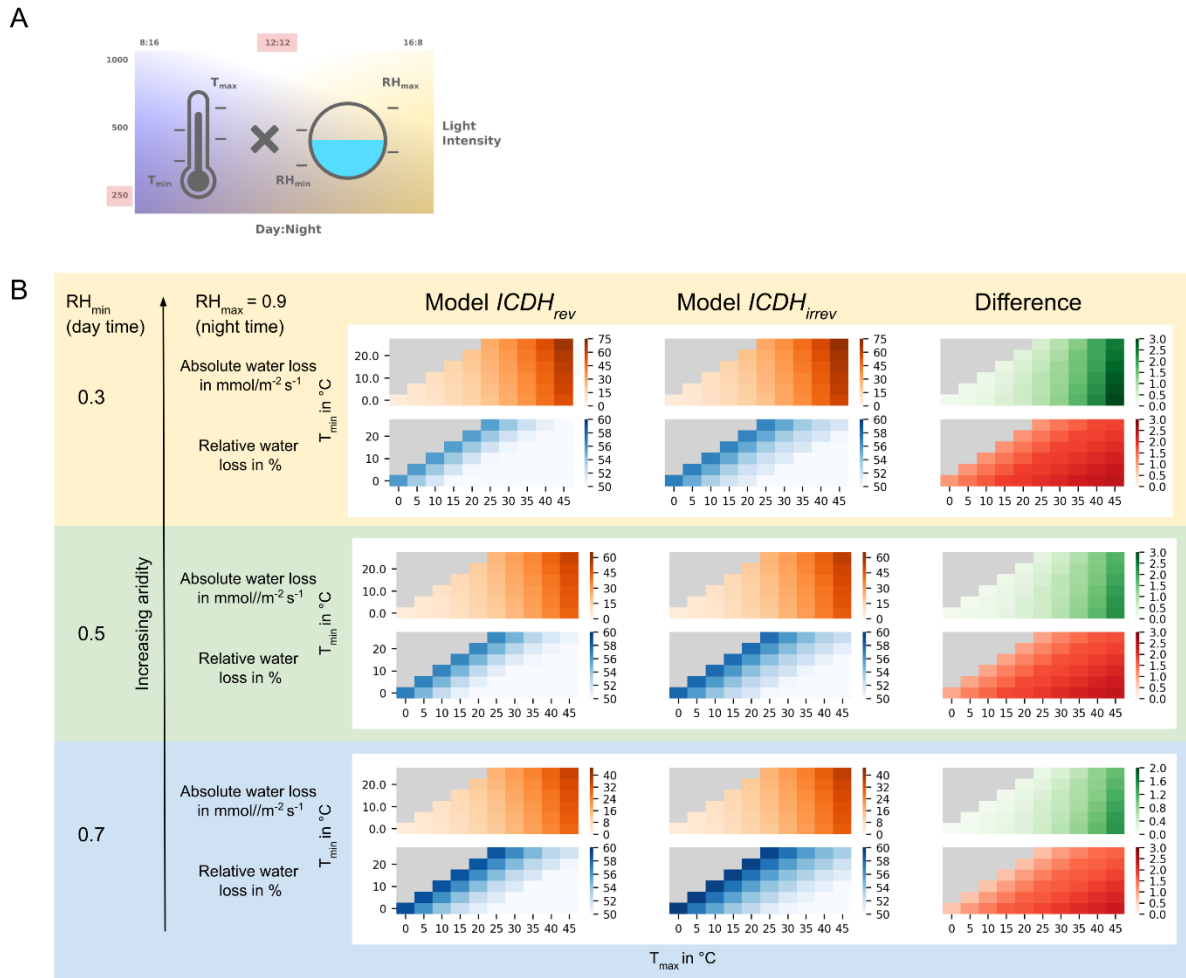

633  
 634 **Fig 5: Absolute and relative water loss of a CAM-like leaf at 70% productivity with**  
 635 **respect to a C<sub>3</sub> leaf for model *ICDH<sub>rev</sub>* and model *ICDH<sub>irrev</sub>* for different temperature T and**  
 636 **relative humidity RH regimes. (A) Overview of the environments analysed. (B) Simulation**  
 637 **results are structured as follows: All simulations are performed for the same RH<sub>min</sub> of 0.3 and**  
 638 **three different values of RH<sub>max</sub> (0.5, 0.7, 0.9) as indicated by the three blocks with different**  
 639 **background colours. Within each block two output values are shown for different combinations**  
 640 **of T<sub>min</sub> and T<sub>max</sub> values represented by the heatmaps: The upper row shows the absolute water**  
 641 **loss for model *ICDH<sub>rev</sub>* (orange heatmap, left) and model *ICDH<sub>irrev</sub>* (orange heatmap, right) and**  
 642 **the difference between model *ICDH<sub>irrev</sub>* and *ICDH<sub>rev</sub>* (green heatmap). The lower row shows**  
 643 **the water loss in % with respect to the C<sub>3</sub> model, again for model *ICDH<sub>rev</sub>* (blue heatmap, left)**  
 644 **and model *ICDH<sub>irrev</sub>* (blue heatmap, right) and the difference (red heatmap). Darker colours**  
 645 **represent a higher value. The results presented here were calculated for a maximum light**  
 646 **intensity of 250 μmol m<sup>-2</sup> s<sup>-1</sup> and a 12:12 day:night cycle. All other results are presented and**  
 647 **discussed in the Supplementary Text.**  
 648

## 649 Supplementary Information

650 Supplementary Text: Supplementary methods and results

651 Supplementary Table 1: Leaf parameters for different C<sub>3</sub> and CAM species

652 Supplementary Table 2: Phloem sap compositions for different species and modelling results  
653 for different species and constraints.

654

## 655 **Abbreviations**

656 Asn: asparagine

657 Asp: asparagine

658 PEP: phosphoenolpyruvate

659 Pro: proline

660 RuBisCO: ribulose-1,5-bisphosphate carboxylase/oxygenase

661 2OG: 2-oxoglutarate

662

## 663 **References**

664 1. Climate change and food security: a framework document.

665 <http://www.fao.org/3/k2595e/k2595e00.htm>.

666 2. Borland, A. M. *et al.* Engineering crassulacean acid metabolism to improve water-use  
667 efficiency. *Trends Plant Sci.* **19**, 327–338 (2014).

668 3. Osmond, C. B. Crassulacean Acid Metabolism: A Curiosity in Context. *Annu Rev Plant*  
669 *Physiol.* **29**, 379–414 (1978).

670 4. Igamberdiev, A. U. & Eprintsev, A. T. Organic Acids: The Pools of Fixed Carbon  
671 Involved in Redox Regulation and Energy Balance in Higher Plants. *Front. Plant Sci.* **7**,  
672 1042 (2016).

673 5. Gawronska, K. & Niewiadomska, E. Participation of citric acid and isocitric acid in the  
674 diurnal cycle of carboxylation and decarboxylation in the common ice plant. *Acta Physiol*  
675 *Plant.* **37**, (2015).

676 6. Lüttge, U. Nocturnal citrate accumulation and its response to environmental stress in the  
677 CAM plant *Kalanchoe pinnata* (Lam.) Pers. *Plant, Cell and Environ.* **13**, 977–982 (1990).

678 7. Maclennan, D. H., Beevers, H. & Harley, J. L. ‘Compartmentation’ of acids in plant  
679 tissues. *Biochemical Journal* **89**, 316–327 (1963).

680 8. Garcia, T. M., Heyduk, K., Kuzmick, E. & Mayer, J. A. Crassulacean acid metabolism  
681 biology. *New Phytol.* **204**, 738–740 (2014).

682 9. Dodd, A. N., Borland, A. M., Haslam, R. P., Griffiths, H. & Maxwell, K. Crassulacean  
683 acid metabolism: plastic, fantastic. *J. Exp. Bot.* **53**, 569–580 (2002).

- 684 10. J. C. Cushman, H. J. B. Molecular Genetics of Crassulacean Acid Metabolism. *Plant*  
685 *Physiol.* **113**, 667 (1997).
- 686 11. Winter, K., Lüttge, U., Winter, E. & Troughton, J. H. Seasonal shift from C3  
687 photosynthesis to Crassulacean Acid Metabolism in *Mesembryanthemum crystallinum*  
688 growing in its natural environment. *Oecologia* **34**, 225–237 (1978).
- 689 12. Cushman, J. C. Crassulacean Acid Metabolism. A Plastic Photosynthetic Adaptation to  
690 Arid Environments. *Plant Physiol.* **127**, 1439–1448 (2001).
- 691 13. Shameer, S., Baghalian, K., Cheung, C. Y. M., Ratcliffe, R. G. & Sweetlove, L. J.  
692 Computational analysis of the productivity potential of CAM. *Nat Plants* **4**, 165–171  
693 (2018).
- 694 14. Holzhütter, H.-G. The principle of flux minimization and its application to estimate  
695 stationary fluxes in metabolic networks. *Eur. J. Biochem.* **271**, 2905–2922 (2004).
- 696 15. Smil, V. *The Earth's Biosphere: Evolution, Dynamics, and Change*. (MIT Press, 2003).
- 697 16. Farnsworth, K. D. & Niklas, K. J. Theories of Optimization, Form and Function in  
698 Branching Architecture in Plants. *Functional Ecology* **9**, 355 (1995).
- 699 17. Kennedy, M. C. Functional–structural models optimize the placement of foliage units for  
700 multiple whole-canopy functions. *Ecological Research* **25**, 723–732 (2010).
- 701 18. Laundry, R. S. & Steuer, R. E. Multiple Criteria Optimisation: Theory, Computation and  
702 Application. *Journal Oper Res Soc.* **39**, 879 (1988).
- 703 19. Cheung, C. Y. M. *et al.* A method for accounting for maintenance costs in flux balance  
704 analysis improves the prediction of plant cell metabolic phenotypes under stress  
705 conditions. *Plant J.* **75**, 1050–1061 (2013).
- 706 20. de Mattos, E. A., Herzog, B. & Lüttge, U. Chlorophyll fluorescence during CAM-phases  
707 in *Clusia minor* L. under drought stress. *J Exp Bot.* **50**, 253–261 (1999).
- 708 21. Lüttge, U. Ecophysiology of Crassulacean Acid Metabolism (CAM). *Ann. Bot.* **93**, 629  
709 (2004).
- 710 22. Cockburn, W. Tansley Review No 1. Variation in Photosynthetic Acid Metabolism in  
711 Vascular Plants: Cam and Related Phenomena. *New Phytol.* **101**, 3–24 (1985).



- 712 23. Schwender, J., Shachar-Hill, Y. & Ohlrogge, J. B. Mitochondrial Metabolism in  
713 Developing Embryos of *Brassica napus*. *J Biol Chem.* **281**, 34040–34047 (2006).
- 714 24. Allen, D. K., Ohlrogge, J. B. & Shachar-Hill, Y. The role of light in soybean seed filling  
715 metabolism. *Plant J.* **58**, 220–234 (2009).
- 716 25. Allen, D. K. & Young, J. D. Carbon and Nitrogen Provisions Alter the Metabolic Flux in  
717 Developing Soybean Embryos. *Plant Physiol.* **161**, 1458–1475 (2013).
- 718 26. Bar-Even, A., Noor, E., Lewis, N. E. & Milo, R. Design and analysis of synthetic carbon  
719 fixation pathways. *Proc. Natl. Acad. Sci. U. S. A.* **107**, 8889–8894 (2010).
- 720 27. Bar-Even, A., Noor, E. & Milo, R. A survey of carbon fixation pathways through a  
721 quantitative lens. *J. Exp. Bot.* **63**, 2325–2342 (2012).
- 722 28. Borland, A. M., Griffiths, H., Broadmeadow, M. S. J., Fordham, M. C. & Maxwell, C.  
723 Short-term changes in carbon-isotope discrimination in the C3-CAM intermediate *Clusia*  
724 *minor* L. growing in Trinidad. *Oecologia* **95**, 444–453 (1993).
- 725 29. Roberts, A., Borland, A. M. & Griffiths, H. Discrimination Processes and Shifts in  
726 Carboxylation during the Phases of Crassulacean Acid Metabolism. *Plant Physiol.* **113**,  
727 1283–1292 (1997).
- 728 30. Sanada, Y. *et al.* Novel Light-Dark Change of Proline Levels in Halophyte  
729 (*Mesembryanthemum crystallinum* L.) and Glycophytes (*Hordeum vulgare* L. and  
730 *Triticum aestivum* L.) Leaves and Roots under Salt Stress. *Plant Cell Physiol.* **36**, 965–  
731 970 (1995).
- 732 31. Herppich, M., von Willert, D. J. & Herppich, W. B. Diurnal Rhythm in Citric Acid Content  
733 Preceded the Onset of Nighttime Malic Acid Accumulation during Metabolic Changes  
734 from C3 to CAM in Salt-stressed Plants of *Mesembryanthemum crystallinum*. *J Plant*  
735 *Physiol.* **147**, 38–42 (1995).
- 736 32. Rügen, M., Bockmayr, A. & Steuer, R. Elucidating temporal resource allocation and  
737 diurnal dynamics in phototrophic metabolism using conditional FBA. *Sci. Rep.* **5**, 15247  
738 (2015).
- 739 33. Reimers, A.-M., Knoop, H., Bockmayr, A. & Steuer, R. Cellular trade-offs and optimal

- 740 resource allocation during cyanobacterial diurnal growth. *Proc. Natl. Acad. Sci. U. S. A.*  
741 **114**, E6457–E6465 (2017).
- 742 34. Goelzer, A. *et al.* Quantitative prediction of genome-wide resource allocation in bacteria.  
743 *Metab. Eng.* **32**, 232–243 (2015).
- 744 35. Bulović, A. *et al.* Automated generation of bacterial resource allocation models. *Metab.*  
745 *Eng.* **55**, 12–22 (2019).
- 746 36. Yang, X. *et al.* A roadmap for research on crassulacean acid metabolism (CAM) to  
747 enhance sustainable food and bioenergy production in a hotter, drier world. *New Phytol.*  
748 **207**, 491–504 (2015).
- 749 37. Wai, C. M. *et al.* Time of day and network reprogramming during drought induced CAM  
750 photosynthesis in *Sedum album*. *PLoS Genet.* **15**, e1008209 (2019).
- 751 38. Borland, A. M., Griffiths, H., Hartwell, J. & Smith, J. A. C. Exploiting the potential of  
752 plants with crassulacean acid metabolism for bioenergy production on marginal lands. *J*  
753 *Exp Bot.* **60**, 2879–2896 (2009).
- 754 39. Rasmijn, L. M. *et al.* Future equivalent of 2010 Russian heatwave intensified by  
755 weakening soil moisture constraints. *Nat. Clim. Chang.* **8**, 381–385 (2018).
- 756 40. Lopez, H. *et al.* Early emergence of anthropogenically forced heat waves in the western  
757 United States and Great Lakes. *Nat. Clim. Chang.* **8**, 414–420 (2018).
- 758 41. Winter, K. Ecophysiology of constitutive and facultative CAM photosynthesis. *J. Exp.*  
759 *Bot.* **70**, 6495–6508 (2019).
- 760 42. Winter, K. & Smith, J. A. C. Crassulacean Acid Metabolism: Current Status and  
761 Perspectives. in *Crassulacean Acid Metabolism* (eds. Winter, K. & Smith, J. A. C.) **114**,  
762 389–426 (Springer, Berlin, Heidelberg, 1996).
- 763 43. Silvera, K. *et al.* Evolution along the crassulacean acid metabolism continuum.  
764 *Functional Plant Biology* **37**, 995 (2010).
- 765 44. Edwards, E. J. Evolutionary trajectories, accessibility and other metaphors: the case of  
766 C and CAM photosynthesis. *New Phytol.* **223**, 1742–1755 (2019).
- 767 45. Edwards, Edwards & Donoghue. *Pereskia* and the Origin of the Cactus Life-Form. *The*

- 768        *Am Nat.* **167**, 777 (2006).
- 769    46. Heyduk, K., Ray, J. N., Ayyampalayam, S. & Leebens-Mack, J. Shifts in gene  
770        expression profiles are associated with weak and strong Crassulacean acid metabolism.  
771        *Am. J. Bot.* **105**, 587–601 (2018).
- 772    47. Evans, J. R. & von Caemmerer, S. Carbon Dioxide Diffusion inside Leaves. *Plant*  
773        *Physiol.* **110**, 339–346 (1996).
- 774    48. Barrera Zambrano, V. A., Lawson, T., Olmos, E., Fernández-García, N. & Borland, A.  
775        M. Leaf anatomical traits which accommodate the facultative engagement of  
776        crassulacean acid metabolism in tropical trees of the genus *Clusia*. *J. Exp. Bot.* **65**,  
777        3513–3523 (2014).
- 778    49. Lim, S. D. *et al.* A *Vitis vinifera* basic helix-loop-helix transcription factor enhances plant  
779        cell size, vegetative biomass and reproductive yield. *Plant Biotechnol. J.* (2018)  
780        doi:10.1111/pbi.12898.
- 781    50. Cheung, C. Y. M., Poolman, M. G., Fell, D. A., Ratcliffe, R. G. & Sweetlove, L. J. A Diel  
782        Flux Balance Model Captures Interactions between Light and Dark Metabolism during  
783        Day-Night Cycles in C3 and Crassulacean Acid Metabolism Leaves. *Plant Physiol.* **165**,  
784        917–929 (2014).
- 785    51. Ma, F., Jazmin, L. J., Young, J. D. & Allen, D. K. Isotopically nonstationary <sup>13</sup>C flux  
786        analysis of changes in *Arabidopsis thaliana* leaf metabolism due to high light  
787        acclimation. *Proc. Natl. Acad. Sci. U. S. A.* **111**, 16967–16972 (2014).
- 788    52. Nobel, P. S. *Physicochemical and Environmental Plant Physiology*. (Academic Press,  
789        2012).
